# Supplementary material
Source: PubMed Central journal article supplement (PMC7416460)
Supplement: NIHMS1591958-supplement-1.pdf [file NIHMS1591958-supplement-1.pdf]

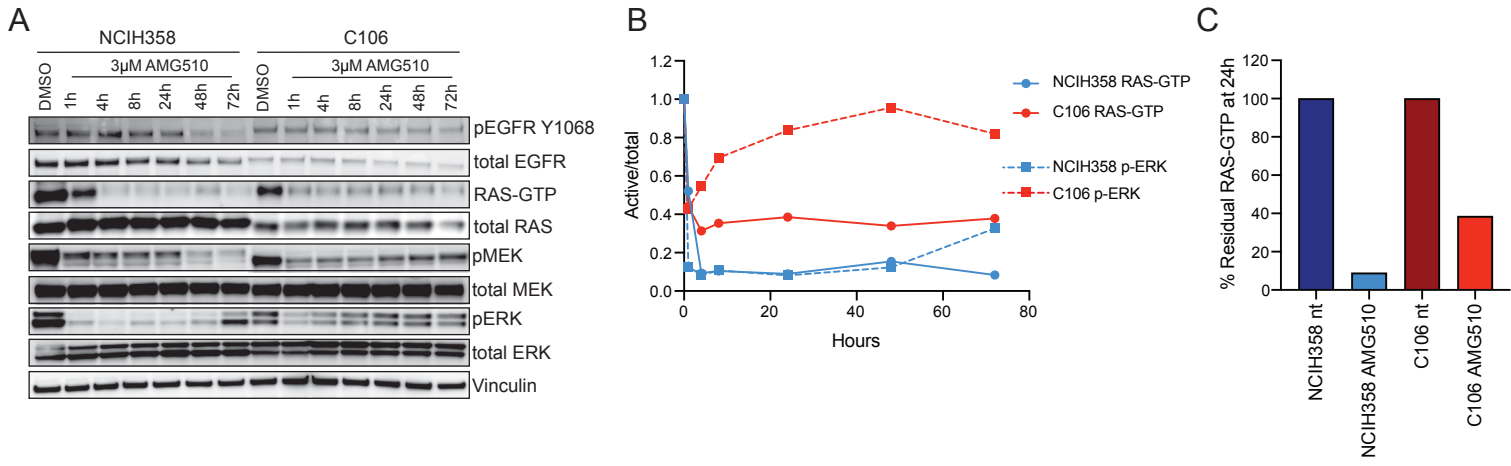

**Supplementary Figure 1: Response to KRAS G12C inhibition in time course in CRC cell lines.** (A) Western blot analysis of NCIH358 (NSCLC) and C106 (CRC) cell lines upon AMG510 treatment in time course. RAS-GTP pull down assay is included, and Vinculin is used as loading control. (B) Densitometry quantification of RAS-GTP and p-ERK from blot in (A). p-ERK values are normalized on both total ERK and Vinculin, RAS-GTP values are normalized on total RAS. (C) Bar-graph of percentage of active RAS (RAS-GTP) at 24h.
