# Supplementary material
Source: PubMed Central journal article supplement (PMC7416460)
Supplement: NIHMS1591958-supplement-3.pdf [file NIHMS1591958-supplement-3.pdf]

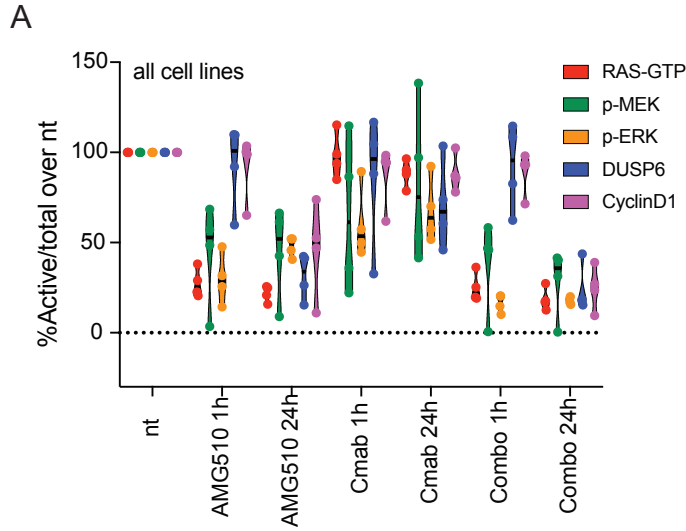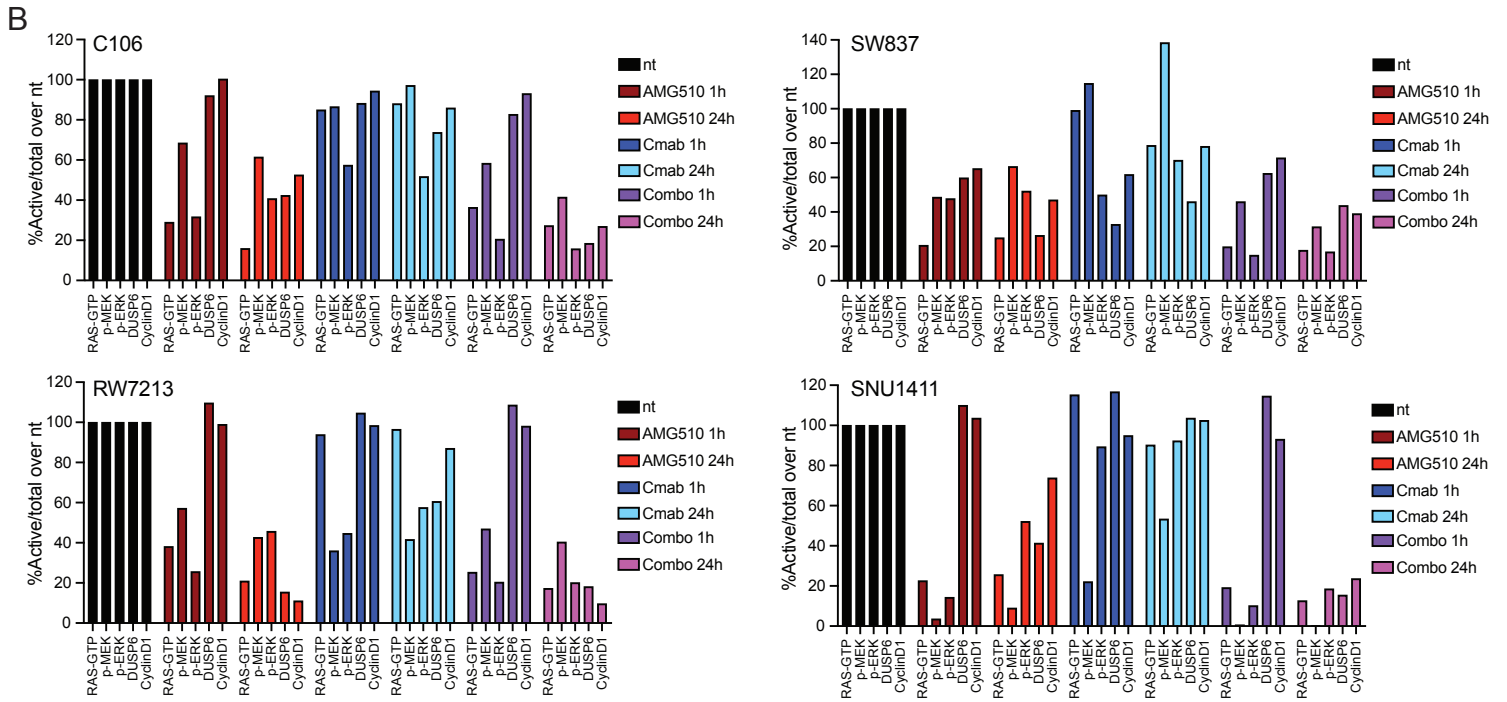

**Supplementary Figure 3: Densitometry analysis of western blot reported in Figure 3A.** (A) Violin plot of all cell lines showing the distribution of activated/expressed proteins. (B) Same values reported in A shown for each single cell lines. Phospho proteins values are normalized on total proteins and Vinculin and on DMSO control. DUSP6 and CyclinD1 values are normalized on Vinculin and on DMSO control.
