# Supplementary material
Source: PubMed Central journal article supplement (PMC7416460)
Supplement: NIHMS1591958-supplement-4.pdf [file NIHMS1591958-supplement-4.pdf]

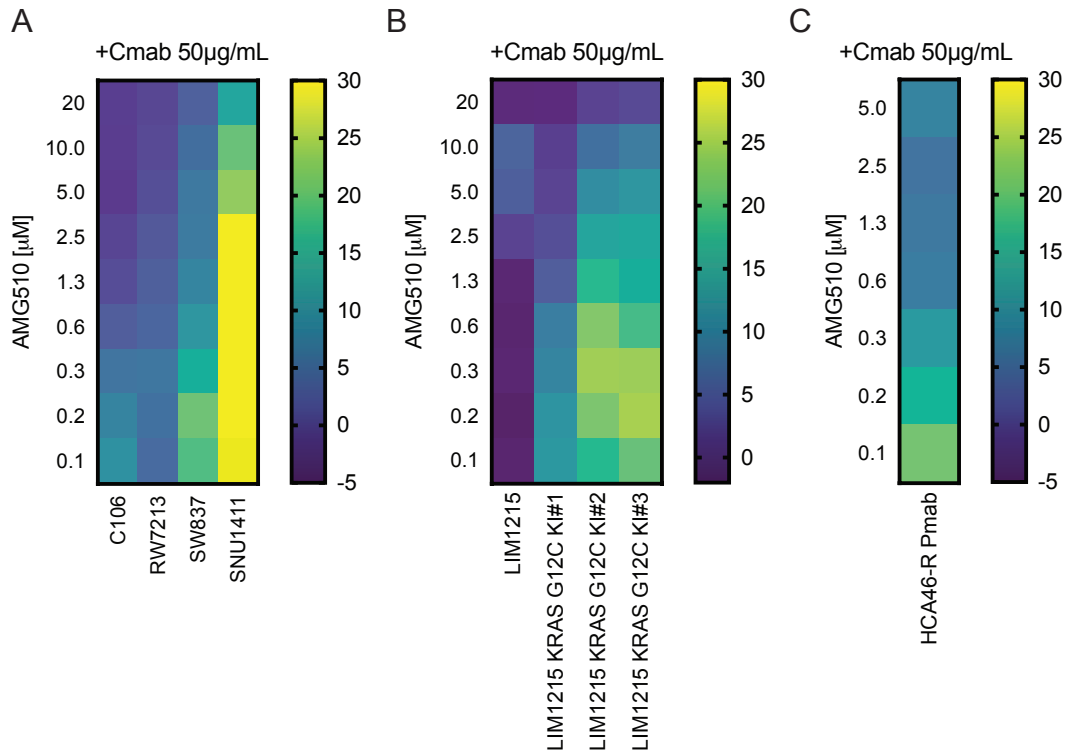

**Supplementary Figure 4: Synergy score.** Heatmaps of excess over the Bliss (Bliss score) of proliferation assay reported in 3B (A), 3G (B) and 3H (C).
